# Supplementary material for: TNF-α induces AQP4 overexpression in astrocytes through the NF-κB pathway causing cellular edema and apoptosis
Source: Oxford University Press journal article supplement (doi:10.1042/bsr20212224), 2022-03-01
Supplement: bsr-2021-2224_supp.pdf [file bsr-2021-2224_supp.pdf]

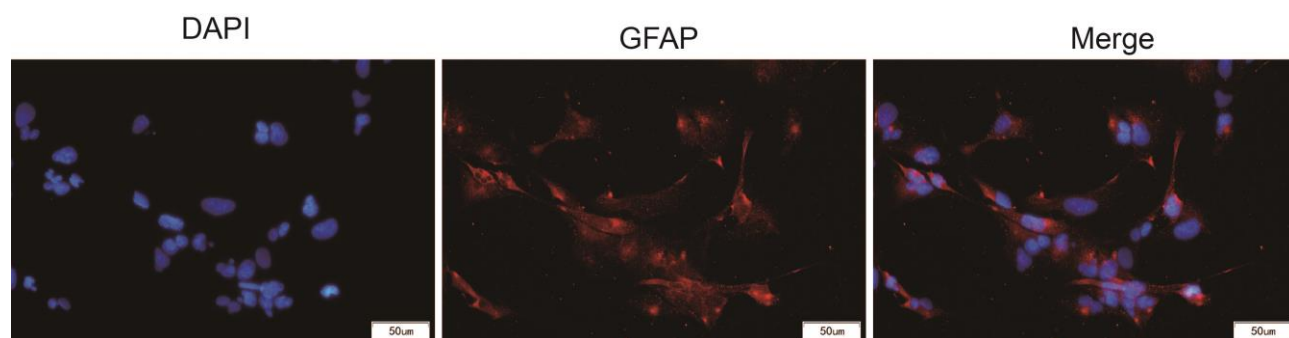

**Figure S1.** Cultured cells were stained with GFAP. Scale bar: 50  $\mu\text{m}$ .
